# Supplementary material for: On the role of thermal activation in selective photochemistry: mechanistic insight into the oxidation of propene on the V4O11−cluster
Source: Royal Society of Chemistry journal article supplement (doi:10.1039/c1cp22550b), 2011-11-10
Supplement: c1cp22550b.pdf [file c1cp22550b.pdf]

SUPPLEMENTARY INFORMATION: THE KINETIC MODEL OF COMPLEX FORMATION

Mechanism:

Direct collision induced dissociation (CID)

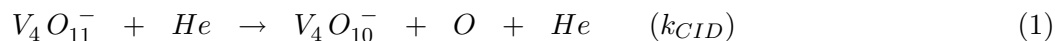

Pre-equilibrium of aggregation and irreversible hydrogen transfer:

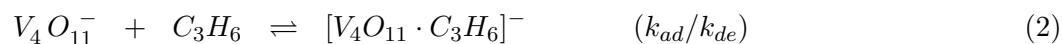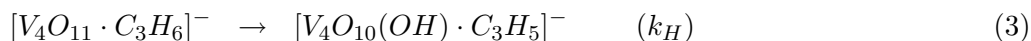

Definitions:

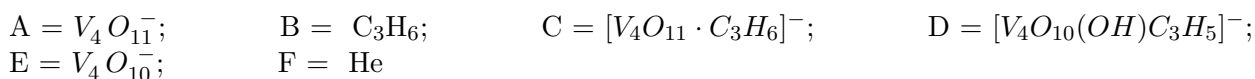

Rate Equations:

$$\frac{d[A]}{dt} = -k_{ad}[A][B] + k_{de}[C] - k_{CID}[A][F] \quad (4)$$

$$\frac{d[B]}{dt} = 0 \quad (5)$$

$$\frac{d[C]}{dt} = +k_{ad}[A][B] - k_{de}[C] - k_H[C] \quad (6)$$

$$\frac{d[D]}{dt} = +k_H[C] \quad (7)$$

$$\frac{d[E]}{dt} = +k_{CID}[A][F] \quad (8)$$

$$\frac{d[F]}{dt} = 0 \quad (9)$$

Constant Gas Pressure:

$$k_{ad}[A][B] = k'_{ad}[A] \quad \text{define: } k'_{ad} = k_{ad}[B] \quad (10)$$

$$k_{ad}[A][F] = k'_{CID}[A] \quad \text{define: } k'_{CID} = k_{CID}[F] \quad (11)$$

Steady-State Approximation:

$$\frac{d[C]}{dt} = 0 = +k_{ad}[A][B] - k_{ad}[C] - k_H[C]$$

$$\text{with (10)} \rightarrow 0 = +k'_{ad}[A] - k_{de}[C] - k_H[C]$$

$$0 = k'_{ad}[A] - (k_{de} + k_H)[C]$$

$$[C] = \left( \frac{k'_{ad}}{k_{de} + k_H} \right) [A]$$

$$[C] = k_{Eq}[A] \quad \text{define: } k_{Eq} = \left( \frac{k'_{ad}}{k_{de} + k_H} \right) \quad (12)$$

Educt Behavior, ( $V_4O_{11}^-$ ):

$$\begin{aligned} \frac{d[A]}{dt} &= -k_{ad}[A][B] + k_{de}[C] - k_{CID}[A][F] \\ \text{with (10), (11)} \rightarrow \frac{d[A]}{dt} &= -k'_{ad}[A] + k_{de}[C] - k'_{CID}[A] \\ \text{with (15)} \rightarrow \frac{d[A]}{dt} &= -k'_{ad}[A] + k_{de}k_{Eq}[A] - k'_{CID}[A] \\ \frac{d[A]}{dt} &= (-k'_{ad} + k_{de}k_{Eq} - k'_{CID})[A] \\ \text{define: } k_{\Sigma} &= k'_{ad} - k_{de}k_{Eq} + k'_{CID} \end{aligned} \quad (13)$$

$$\begin{aligned} \frac{d[A]}{dt} &= -k_{\Sigma}[A] \\ \int_{[A_0]}^{[A(t)]} \frac{1}{[A]} d[A] &= -k_{\Sigma} \int_0^t dt \\ [A(t)] &= [A_0]e^{-k_{\Sigma}t} \end{aligned} \quad (14)$$

Complex Product Behavior, [ $V_4O_{10}(OH)C_3H_5^-$ ]:

$$\begin{aligned} \frac{d[D]}{dt} &= +k_H[C] \\ \text{with (12)} \rightarrow \frac{d[D]}{dt} &= +k_Hk_{Eq}[A] \\ \text{with (14)} \rightarrow \frac{d[D]}{dt} &= +k_Hk_{Eq}([A_0]e^{-k_{\Sigma}t}) \\ \text{define: } k_{CF} &= k_Hk_{Eq} \end{aligned} \quad (15)$$

$$\begin{aligned} \int_{[D_0]=0}^{[D(t)]} d[D] &= k_{CF}[A_0] \int_0^t e^{-k_{\Sigma}t} dt \\ [D(t)] &= \frac{k_{CF}}{k_{\Sigma}}[A_0](1 - e^{-k_{\Sigma}t}) \end{aligned} \quad (16)$$

CID-Product Behavior ( $V_4O_{10}^-$ ):

$$\begin{aligned} \frac{d[E]}{dt} &= +k_{CID}[A][F] \\ \text{with (11)} \rightarrow \frac{d[E]}{dt} &= +k'_{CID}[A] \\ \text{with (14)} \rightarrow \frac{d[E]}{dt} &= +k'_{CID}([A_0]e^{-k_{\Sigma}t}) \\ \int_{[E_0]=0}^{[E(t)]} d[E] &= k'_{CID}[A_0] \int_0^t e^{-k_{\Sigma}t} dt \\ [E(t)] &= \frac{k'_{CID}}{k_{\Sigma}}[A_0](1 - e^{-k_{\Sigma}t}) \end{aligned} \quad (17)$$

---

## FIT PROCEDURE:

The experimental data for the educt ( $V_4O_{11}^-$ ), the final complex product ( $[V_4O_{10}(OH)C_3H_5]^-$ ) and CID-product ( $V_4O_{10}^-$ ) is normalized to the sum of all ion signals to account for the 5-7 % losses due to leakage from the ion trap over the substantial storage time of up to 12 s (as shown in Fig. 1). After normalization to the sum signal, the experimental data of the educt signal is fit with equation (14) for 200, 250 and 300 K. The values for  $k_\Sigma$  that are obtained from the fit give the behavior of  $\frac{1}{k_\Sigma}(1 - e^{-k_\Sigma t})$  for the respective temperature. The values of this expression are used to extract  $k_{CF}$  and  $k_{CID}$  from the experimental data in the formation of the complex and CID-product over the full storage time with equations (16) and (17), respectively. The pressure normalized rate constants are given in Tables 1-3 below.

---

## RATE CONSTANTS FROM THE MODEL:

Tabelle 1: Rate Constants for the Educt Depletion:  $k_\Sigma = k'_{ad} - k_{de}k_{Eq} + k'_{CID}$

| Temperature / K | $k_\Sigma^* / s^{-1}$                         |
|-----------------|-----------------------------------------------|
| 200             | $2.38 \times 10^{-1} \pm 0.35 \times 10^{-1}$ |
| 250             | $6.63 \times 10^{-1} \pm 0.22 \times 10^{-1}$ |
| 300             | $8.40 \times 10^{-1} \pm 0.17 \times 10^{-1}$ |

Tabelle 2: Rate Constants for the Complex Formation:  $k_{CF} = k_{Eq}k_H$

| Temperature / K | $k_{CF}^* / s^{-1}$                           |
|-----------------|-----------------------------------------------|
| 200             | $1.98 \times 10^{-1} \pm 0.17 \times 10^{-1}$ |
| 250             | $5.82 \times 10^{-1} \pm 0.26 \times 10^{-1}$ |
| 300             | $7.39 \times 10^{-1} \pm 0.27 \times 10^{-1}$ |

Tabelle 3: Rate Constants for the CID-Product Formation:  $k'_{CID}$

| Temperature / K | $k'_{CID}^* / s^{-1}$                         |
|-----------------|-----------------------------------------------|
| 200             | $4.01 \times 10^{-2} \pm 1.32 \times 10^{-2}$ |
| 250             | $8.01 \times 10^{-2} \pm 1.53 \times 10^{-2}$ |
| 300             | $10.1 \times 10^{-2} \pm 2.12 \times 10^{-2}$ |

\*Precision of the rate constants is given by the standard deviation of the experimental data from the kinetic model
